# Supplementary material for: Propionibacterium acnes Augments Antitumor, Anti-Angiogenesis and Immunomodulatory Effects of Melatonin on Breast Cancer Implanted in Mice
Source: PubMed Central journal article supplement (PMC4412818; doi:10.1371/journal.pone.0124384), 2015-04-28
Supplement: pone.0124384.s001.pdf [file pone.0124384.s001.pdf]

S1 Table:

Summary of the anticancer activity mechanisms mediated by melatonin, *Propionibacterium acnes*, and their combination. (+: active, ++: highly active, - : no activity, +/-: slight activity).

| <b>Anticancer mechanism</b>   | <b>Melatonin</b> | <b><i>Propionibacterium acnes</i></b> | <b>Combination effect</b> |
|-------------------------------|------------------|---------------------------------------|---------------------------|
| Apoptosis induction           | +                | ++                                    | +++                       |
| Inhibition of VEGF expression | +                | -                                     | +                         |
| INF- $\gamma$ induction       | ++               | +                                     | +++                       |
| Induce tumor necrosis         | +                | ++                                    | +++                       |
| Reduction of tumor size       | +                | -                                     | ++                        |
| Inhibit metastasis            | -/+              | -/+                                   | +                         |
